# Supplementary material for: Analytical Validation of Multiplex Biomarker Assay to Stratify Colorectal Cancer into Molecular Subtypes
Source: PubMed Central journal article supplement (PMC6529539; doi:10.1038/s41598-019-43492-0), 2019-05-21

## Supplementary Information

### Analytical Validation of Multiplex Biomarker Assay to Stratify Colorectal Cancer into Molecular Subtypes

Chanthirika Ragulan<sup>1,2,†</sup>, Katherine Eason<sup>1,†</sup>, Elisa Fontana<sup>1,2,†</sup>, Gift Nyamundanda<sup>1,2,†</sup>, Noelia Tarazona<sup>3</sup>, Yatish Patil<sup>1,2</sup>, Pawan Poudel<sup>1</sup>, Rita T. Lawlor<sup>4,5</sup>, Maguy Del Rio<sup>6</sup>, Koo Si-Lin<sup>7</sup>, Tan Wah Siew<sup>8</sup>, Francesco Sclafani<sup>9</sup>, Ruwaida Begum<sup>9</sup>, Larissa S. Teixeira Mendes<sup>2</sup>, Pierre Martineau<sup>6</sup>, Aldo Scarpa<sup>4,5</sup>, Andrés Cervantes<sup>3</sup>, Iain Beehuat Tan<sup>8,10,11</sup>, David Cunningham<sup>2,9</sup> and Anguraj Sadanandam<sup>1,2,\*</sup>

1. Division of Molecular Pathology, The Institute of Cancer Research, London, United Kingdom
2. Centre for Molecular Pathology, The Royal Marsden NHS Foundation Trust, London, United Kingdom
3. CIBERONC, Department of Medical Oncology, Biomedical Research Institute INCLIVA, University of Valencia, Valencia, Spain
4. ARC-Net Centre for Applied Research on Cancer, University and Hospital Trust of Verona, Verona, Italy
5. Department of Pathology and Diagnostics, University and Hospital Trust of Verona, Verona, Italy
6. Institut de Recherche en Cancérologie de Montpellier, Institut National de la Santé et de la Recherche Médicale, U896, Université Montpellier, Centre Régional de Lutte contre le Cancer Val d'Aurelle Paul Lamarque, Montpellier, France.
7. National Cancer Centre Singapore, Singapore
8. Singapore General Hospital, Singapore

Ragulan, et al.

9. Department of Medicine, The Royal Marsden NHS Foundation Trust, London, United Kingdom
10. Genome Institute of Singapore, Singapore
11. Duke-NUS Medical School, Singapore

† These authors contributed equally as first authors

\* **Correspondence to**

Anguraj Sadanandam, Ph.D., Systems and Precision Cancer Medicine Team, Institute of Cancer Research (ICR), 15 Cotswold Road, Sutton, Surrey, SM2 5NG, United Kingdom;

Email: [anguraj.sadanandam@icr.ac.uk](mailto:anguraj.sadanandam@icr.ac.uk)

Tel: +44 (0) 20 8915 6631

**Running title:** Colorectal Cancer Subtype Biomarker Assay

**Keywords:** colorectal cancer, subtype diagnostic assay, biomarker prediction, multiplex biomarker assay, nCounter platform, FFPE, fresh frozen

## **Supplementary Methods and Materials**

### ***RNA isolation and quality control***

For the Singapore fresh frozen (FF) cohort, 15 mg of tissues were homogenised using 1mL of Invitrogen™ TRIzol™ (Thermo Fisher Scientific, Singapore) with gentleMACS™ M tube using gentleMACS™ Octo Dissociator (Miltenyi Biotec, Singapore) as per the manufacturer's instructions. The total RNA from homogenised tissues was extracted using QIAGEN RNeasy Mini Kit (QIAGEN, Singapore), following the manufacturer's protocol.

For fresh frozen samples from INCLIVA-Valencia cohort, tumour blocks with high tumour content were selected by a pathologist. The total RNA from homogenised tissues was extracted using Ambion RecoverAll™ kit (Life Technologies, CA, USA) as per manufacturers' instructions.

For formalin fixed paraffin embedded (FFPE) samples from INCLIVA-Valencia and RETRO-C cohorts, areas with high tumour content were marked on an H&E slide and macrodissected in 7-10 unstained slides (7-10 µm) using a xylene based deparaffinization method. The total RNA was extracted using the Ambion RecoverAll™ protocol as per manufacturer's instructions (Life Technologies). FFPE samples from Singapore FFPE cohort were isolated using Qiagen RNeasy FFPE kit (Qiagen).

All samples were quantified using NanoDrop 2000 Spectrophotometer (ThermoFisher Scientific, East Grinstead, UK). Certain samples were also assessed using Agilent RNA 6000 Nano Kit (Agilent, Santa Clara, CA, USA) where required.

### ***Processing and quality control of nCounter data***

Data quality from NanoString assay was checked and data normalization was performed using nSolver analysis software v3.0 (NanoString Technologies). Firstly, counts were corrected to background noise using geometric means of 8 negative control probes followed by the correction using geometric means of 6 internal positive control spike-ins in each lane/sample to correct potential sources of variations across the samples. These negative and positive probes were built-in in both standard and modified protocols. Only those housekeeping genes with raw molecular counts greater than 50 and those selected by geNorm algorithm (part of the nSolver analysis software) were retained for further analysis. Variations due to RNA input volume were corrected by normalising to the expression of geNorm selected housekeeping genes. The normalised final count data were log<sub>2</sub> transformed for further analysis. Data generated from PanCancer Progression were also analysed for biological pathways using the nCounter Advanced Analysis plugin (v1.0.84) for nSolver analysis software.

### ***Comparison of standard and modified protocols***

For comparison of standard and modified protocols, housekeeping genes that were common between these two datasets were used for normalisation. Data from standard and modified protocols were row (gene)-median centred across samples separately, before being combined to perform hierarchical clustering or Pearson correlation analysis.

### ***Generation and quality control of microarray data***

For the OriGene cohort, 100 ng of total RNA was used for first strand cDNA synthesis and labelled according to the manufacturer's protocol. Labelled single stranded cDNA was hybridised in GeneChip Human Transcriptome Array (HTA) 2.0 (Affymetrix, High Wycombe, UK) then arrays were washed (Gene Chip Fluidics station 450) and scanned (Gene Chip Scanner).

### ***Generation, quality control and analysis of RNA-Seq data***

RNAseq libraries were prepared using TruSeq Stranded mRNA Library Prep Kit (Illumina, Singapore). Libraries were quality controlled using KAPA qPCR (Roche, Singapore) and Agilent Bioanalyzer, before pooling and sequencing on the Illumina HiSeq (Illumina) to a median of 22 million paired reads per sample. Fastq files were checked for reads counts for paired end reads and read quality using fastqc (v0.11.4)<sup>1</sup>. All 17 samples had mean Phred score greater than 34. Mapping quality was checked using RSEM (v1.2.22)<sup>2</sup> - samtools-flagstat (1.3.1)<sup>3</sup> using reference transcriptome (GRCh37). RNA quality (ribosomal, coding, intronic and intergenic) was checked using the CollectRnaSeqMetrics function of picard (v2.1.0)<sup>4</sup> on mapping to reference genome (GRCh37). Transcripts per million (TPM) values were calculated using RSEM, genes with <20% missing values were retained and  $\log_2(\text{TPM}+1)$  transformed.

### ***Subtype concordance and significance***

Subtype concordance between two different platforms was calculated as the percentage of samples that showed the same subtype in both (not including undetermined samples). Subtypes were deemed concordant between CRCA and CMS subtypes based on the following association: CMS1 $\approx$ Inflammatory; CMS2 $\approx$ Enterocyte and TA; CMS3 $\approx$ Goblet-like; CMS4 $\approx$ Stem-like<sup>5</sup>. Fisher's exact test or chi-squared test were used as appropriate to assess significance of associations; proportion tests<sup>6</sup> were used to compare distributions of subtypes between assays.

### ***Batch effect assessment and merging of microarray/RNAseq datasets***

Batch effects for any particular platform or cross-platforms were assessed using principal component analysis (PCA). Microarray (Montpellier and OriGene cohorts) and RNAseq (Singapore cohort)  $\log_2$  normalised data (n=51) were merged after correcting batch effects using the ComBat<sup>7</sup> (*sva* R package v3.22.0) tool, for the purpose of heatmap visualisation only in Figure 4c (not subtyping), to remove any platform-specific effects. Supplementary Figure S3e shows the results of PCA before and after correcting batch effects in these pooled cohorts.

### ***Clustering and heatmaps of samples' gene expression***

All sample clustering was performed using Euclidean distance and complete linkage as implemented in the hclust and dist functions of the R package *stats* (v3.3.2). Arc plots were generated using the *circlize* package (v0.4.0). Heatmaps were plotted from gene-wise median-centred expression data thresholded to [-3, 3] using the *heatmap.plus* package (v1.3).

### ***R packages and availability of our packages***

R package *e1071* (v1.6-8)<sup>8</sup> was utilised for both SVM methods; *randomForest* (v4.6-12)<sup>9</sup> for RF; *sma* (v0.5.17)<sup>10</sup> for BW and DLDA; *pamr* (v1.55)<sup>11</sup> for PAM; and *stats* for tests of proportions<sup>6</sup>. An R package *intPredict* and other tools are available at GitHub <https://github.com/syspremed/>.

## Supplementary Figure Legends

**Supplementary Figure S1. PCA and clustering analysis of standard and modified protocol assays for fresh frozen samples. a-b.** PCA of the combined Montpellier and OriGene cohorts of samples (n=22) assayed using the a) standard protocol and b) modified protocol. **c.** Heatmap of expression levels of selected 50 (48 CRCA + 2 other) genes for these samples (n=22) as measured on a custom nCounter panel using the modified protocol. The top bar shows the cohort each sample originated from (colours as in legend provided). **d-e.** PCA analysis of d) combined standard and modified protocols (after median centring of each dataset separately by protocol; n=22) and e) median-centred data of two technical replicates performed at an interval with median 40 weeks using the modified protocol (n=5).

**Supplementary Figure S2. PCA and clustering analysis of standard and modified protocol assays for FFPE samples. a.** PCA analysis of the RETRO-C cohort of samples assayed using the standard protocol (n=12). **b.** Heatmap of expression levels of selected 50 (48 CRCA + 2 other) genes for these samples as measured on a custom nCounter panel using standard protocol. The top bar shows the cohort each sample originated from (colours as in legend; n=12). **c.** PCA analysis of the RETRO-C cohort of samples assayed using the modified protocol (n=12). **d.** Heatmap of expression levels of selected 50 (48 CRCA + 2 other) genes for these samples as measured on a custom nCounter panel using the modified protocol (n=12). **e-f.** PCA analysis of e) combined standard and modified protocols (after median centring of each dataset separately by protocol; n=12) and f) two technical replicates performed with the modified protocol (n=5). Cartridges represent samples assayed at different time points/batches.

**Supplementary Figure S3. PCA and heatmaps of nCounter PanCancer Progression Panel for Montpellier and OriGene cohorts. a.** PCA analysis of nCounter PanCancer Progression panel data showing the distribution of samples run in three batches from the Montpellier and OriGene cohorts (n=34). **b.** Heatmap of expression of all 740 genes measured on this nCounter PanCancer Progression panel (n=34). **c-d.** Heatmaps showing the expression of all genes from different pathways in each PanCancer Progression Panel gene set shown in Figure 4b (n=34). Top bars in b-d) show the NanoCRCA, CRCA-38, CRCA-786 and CMS subtype for each sample and the batch in which that sample was processed. Colours for batch/cartridge are as in the legend. **e-f.** PCA analysis of merged Montpellier, Singapore FF and OriGene cohorts (n=51) e) before (left panel) and f) after (right panel) batch correction using COMBAT.

**Supplementary Figure S4. PCA and clustering of nCounter assay from the Montpellier cohort. a.** PCA analysis of NanoCRCA data for this cohort showing the distribution of samples run in two batches (n=17). **b.** Heatmap of all 50 (48 CRCA + 2 other) genes measured on the nCounter platform (n=17). Top bars show the subtypes assigned by the four classifiers - NanoCRCA, CRCA-38, CRCA-786 and CMS classifications, and the batch in which each sample was processed. Colours for batch/cartridge are provided. **c.** PCA analysis of microarray data (GSE62080) for this cohort (n=17). **d-e.** Distribution of subtypes for this cohort according to the d) CRCA-38 and e) CRCA-786 classifiers (n=17).

**Supplementary Figure S5. PCA and clustering analysis of nCounter assay from the Singapore FF (fresh frozen) cohort. a.** PCA analysis of NanoCRCA data for this cohort showing the distribution of samples run in multiple batches (represented as cartridges; n=145). **b.** Heatmap of all 50 (48 CRCA + 2 other) genes measured on the nCounter platform for all samples (n=145). Top bars show the subtypes assigned by NanoCRCA assay and the batch in which each sample was processed. Colours for batch/cartridge are as as in the legend. **c.** PCA analysis of RNA-Seq TPM values for this cohort (n=17). **d.** Heatmap of all 50 (48 CRCA + 2 other) genes measured on the nCounter platform for the 13 samples with matched

RNA-Seq data (n=13). Top bars show the subtypes assigned by the four classifiers NanoCRCA, CRCA-38, CRCA-786 and CMS classifications, and the batch in which each sample was processed. Colours for batch/cartridge are provided. **e.** Bar plot for comparisons between NanoCRCA and other classifications (CRCA-38, CRCA-786 and CMS) showing percent concordance to NanoCRCA classification of samples (n=13).

**Supplementary Figure S6. PCA and clustering analysis of nCounter assay from the OriGene cohort.** **a.** PCA analysis of NanoCRCA data for this cohort showing the distribution of samples run in two batches (represented as cartridge; n=17). **b.** Heatmap of all 50 (48 CRCA + 2 other) genes measured on the nCounter platform (n=17). Top bars show the subtypes assigned by the four classifiers - NanoCRCA, CRCA-38, CRCA-786 and CMS classifications, and the batch in which each sample was processed. Colours for batch/cartridge are provided. **c.** PCA analysis of microarray data for the OriGene cohort colored by samples (n=17). **d.** Pie chart showing the proportion of different subtypes (including undetermined samples) from NanoCRCA classification of samples (n=17).

**Supplementary Figure S7. PCA and clustering analysis of nCounter assay from the INCLIVA-Valencia cohort.** **a.** PCA analysis of NanoCRCA data for the fresh frozen samples from this cohort showing the distribution of samples run in multiple batches (represented as cartridges; 58 samples with tumor cellularity >10%). **b.** Heatmap of all 50 (48 CRCA + 2 other) genes measured on the nCounter platform in 24 fresh frozen samples having cellularity  $\geq 70\%$  in both fresh frozen and FFPE tissues. Top bars show the subtypes assigned by NanoCRCA assay and the batch of the samples (represented as cartridges). Colours for batch/cartridge are provided. **c.** PCA analysis of NanoCRCA data for the FFPE data for this cohort showing the distribution of samples run in multiple batches (represented as cartridges; 58 samples with tumor cellularity >10%). **d.** Heatmap of all 50 (48 CRCA + 2 other) genes measured on the nCounter platform in 24 FFPE samples having cellularity  $\geq 70\%$  in both fresh frozen and FFPE tissues. Top bars show the subtypes assigned by NanoCRCA assay and the batch of the samples (represented as cartridges). Colours for batch/cartridge are provided. **e.** Heatmaps showing gene expression of the 38-gene NanoCRCA panel as measured in matched FFPE and fresh frozen tissues with tumour cellularity  $\geq 70\%$  (n=24). Top bars show the subtype as assigned by NanoCRCA in fresh frozen and FFPE tissues. The right-hand vertical bars indicate the subtype association of each gene.

**Supplementary Figure S8. PCA and clustering analysis of nCounter assay from the Singapore FFPE cohort.** **a.** PCA analysis of NanoCRCA data for this cohort showing the distribution of samples run in multiple batches (represented as cartridges; n=106). **b.** Heatmap of all 50 (48 CRCA + 2 other) genes measured on the nCounter platform. Top bars show the subtypes assigned by NanoCRCA assay and the batch of the samples (represented as cartridges; n=106). Colours for batch/cartridge are provided in a).

## Supplementary Table Legends

**Supplementary Table S1. Platform, classifier and cohort information, and list of gene sets used for microarray/RNA-Seq or nCounter assays.** **a)** Overview of relative platform costs and turnaround times. **b)** Overview of expression profile classifiers: derivation, platform, publication in which it was first introduced, and relationships of the classifiers to each other. **c)** Overview of patient cohorts: sample numbers and types, platforms, public data and publications, and patient characteristics. All samples are from surgical specimens collected prior to any treatment. **d)** Original CRCA-786 genes, the 50 genes selected for the custom nCounter panel along with the final 38 genes used for subtype assignment by NanoCRCA, alongside subtype and marker annotation.

**Supplementary Table S2. Normalised fresh frozen nCounter data and housekeeping genes for those samples used for assessing protocols and assay reproducibility – fresh frozen samples from Montpellier and OriGene cohorts.** **a)** Normalised  $\log_2$  data of samples profiled using standard protocol and **b)** modified protocol (both normalised to HKs: *RPL13a*, *PPIA*, *ZNF384*). **c)** Selected housekeeping genes for normalisation of samples profiled for the reproducibility of the modified protocol assay and **d)** normalised  $\log_2$  data of these samples.

**Supplementary Table S3. Contingency tables for subtype concordance between protocols in fresh frozen and FFPE samples.** Concordance metrics, including percentage subtype concordance and Fisher's exact test results, for subtyping using the standard and modified protocols.

**Supplementary Table S4. Normalised FFPE nCounter data and housekeeping genes for those samples used for assessing protocols and assay reproducibility – FFPE samples from RETRO-C cohort.** **a)** Normalised  $\log_2$  data of 12 RETRO-C samples profiled using standard protocol and **b)** modified protocol (both normalised to HKs: *RPL13a*, *PPIA*, *ZNF384*). **c)** Selected housekeeping genes for normalisation of samples profiled for the reproducibility of the modified protocol assay and **d)** normalised  $\log_2$  data of these samples.

**Supplementary Table S5. Training data and misclassification errors for selection of the 38 genes.** **a)** Normalised,  $\log_2$  and median centred data for 195 samples used to select the 38 genes and train PAM centroids. **b)** Gene selection using 12 different gene selection/class prediction methods and the corresponding misclassification error rate.

**Supplementary Table S6. Final subtype assignments.** CRCA-786, CRCA-38, NanoCRCA and CMS subtypes for all samples in all subtyped cohorts.

**Supplementary Table S7. Normalised nCounter PanCancer Progression Panel data and housekeeping genes used for normalisation.** **a)** Selected housekeeping genes and **b)** Normalised  $\log_2$  data for samples profiled using the PanCancer Progression Panel.

**Supplementary Table S8. Contingency tables for subtype concordance between classifiers in fresh frozen samples.** **a)** Concordance metrics, including percentage subtype concordance and Fisher's exact test results, for subtyping using NanoCRCA, CRCA-38, CRCA-786 and CMS classifiers in the pooled Montpellier, Singapore FF, and OriGene cohorts. **b)** Concordance metrics, including percentage subtype concordance and chi-squared test results, for subtyping using CRCA-786 and CMS classifiers in the original Colorectal Cancer Subtyping Consortium (CRCSC) CMS cohort. **c-d)** As **a)** for separate analysis of the **c)** Montpellier, **d)** Singapore FF, and **e)** OriGene cohorts.

**Supplementary Table S9. Housekeeping genes and normalised nCounter data for the cohorts.** **a)** Selected housekeeping genes and **b)** normalised  $\log_2$  data for the Montpellier cohort. **c)** Selected housekeeping genes and **d)** normalised  $\log_2$  data for the Singapore FF cohort. **e)** Selected housekeeping genes and **f)** normalised  $\log_2$  data for the OriGene cohort. **g)** Selected housekeeping genes and **h)** normalised  $\log_2$  data for the INCLIVA-Valencia FF cohort. **i)** Selected housekeeping genes and **j)** normalised  $\log_2$  data for the INCLIVA-Valencia FFPE cohort. **k)** Selected housekeeping genes and **l)** normalised  $\log_2$  data for the Singapore FFPE cohort.



## References

- 1 Andrews, S. FastQC: A Quality Control tool for High Throughput Sequence Data. <http://www.bioinformatics.babraham.ac.uk/projects/fastqc/> (2016).
- 2 Li, B. & Dewey, C. N. RSEM: accurate transcript quantification from RNA-Seq data with or without a reference genome. *BMC Bioinformatics* **12**, 1-16, doi:10.1186/1471-2105-12-323 (2011).
- 3 Li, H. *et al.* The Sequence Alignment/Map format and SAMtools. *Bioinformatics* **25**, 2078-2079, doi:10.1093/bioinformatics/btp352 (2009).
- 4 Broad Institute. Picard. <https://broadinstitute.github.io/picard/> (2015).
- 5 Guinney, J. *et al.* The consensus molecular subtypes of colorectal cancer. *Nature Medicine* **21**, 1350-1356, doi:10.1038/nm.3967 (2015).
- 6 Newcombe, R. G. Two-sided confidence intervals for the single proportion: comparison of seven methods. *Stat Med* **17**, 857-872 (1998).
- 7 Johnson, W. E., Li, C. & Rabinovic, A. Adjusting batch effects in microarray expression data using empirical Bayes methods. *Biostatistics* **8**, 118-127 (2007).
- 8 Meyer, D., Dimitriadou, E., Hornik, K., Weingessel, A. & Leisch, F. e1071: Misc Functions of the Department of Statistics, Probability Theory Group (Formerly: E1071), TU Wien. <https://cran.r-project.org/package=e1071> (2017).
- 9 Liaw, A. & Wiener, M. Classification and regression by randomForest. *R news* **2**, 18-22 (2002).
- 10 Dudoit, S., Yang, Y. & Bolstad, B. sma: Statistical microarray analysis. <https://cran.r-project.org/package=sma> (2011).
- 11 Tibshirani, R., Hastie, T., Narasimhan, B. & Chu, G. Diagnosis of multiple cancer types by shrunken centroids of gene expression. *Proceedings of the National Academy of Sciences* **99**, 6567-6572 (2002).

**Figure S1**

**(a) Standard Protocol**

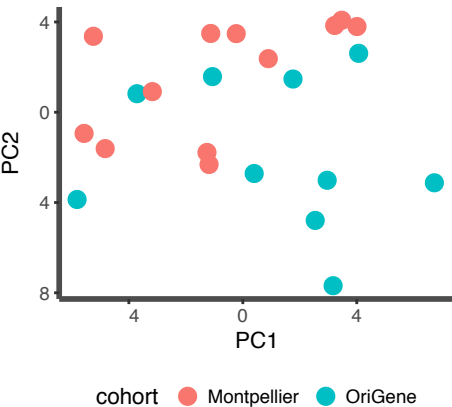

**(b) Modified Protocol**

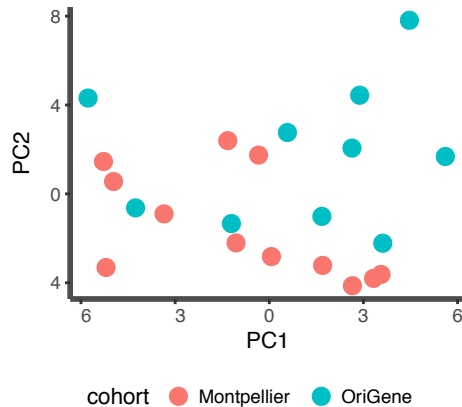

**(d) Modified + Standard Protocol - Median Centred**

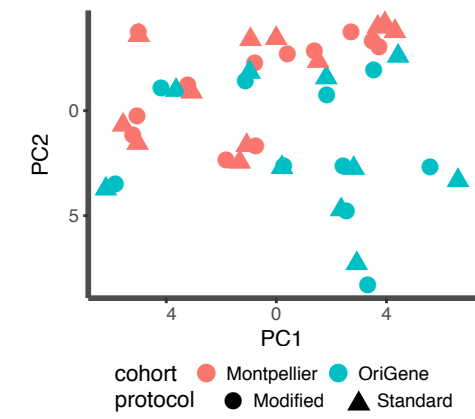

**(e) Modified Protocol Replicates**

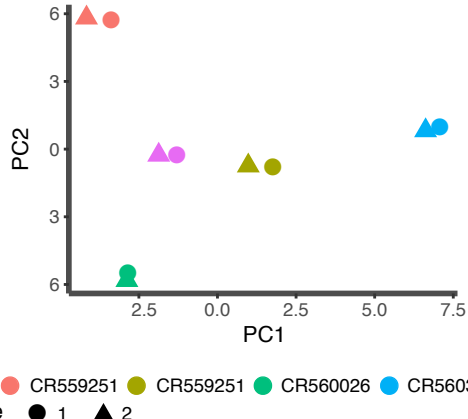

**(c) Modified Protocol**

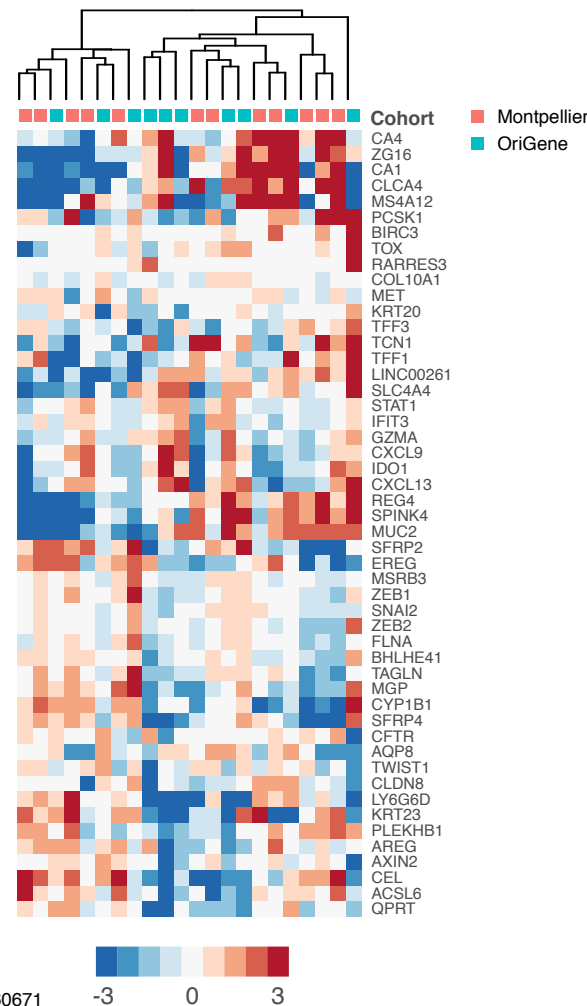

**Figure S2**

**(a) Standard Protocol**

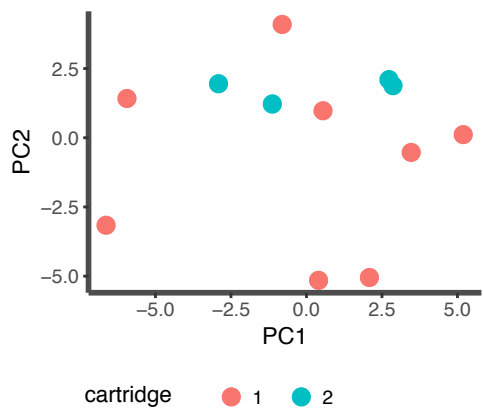

**(b) Standard Protocol**

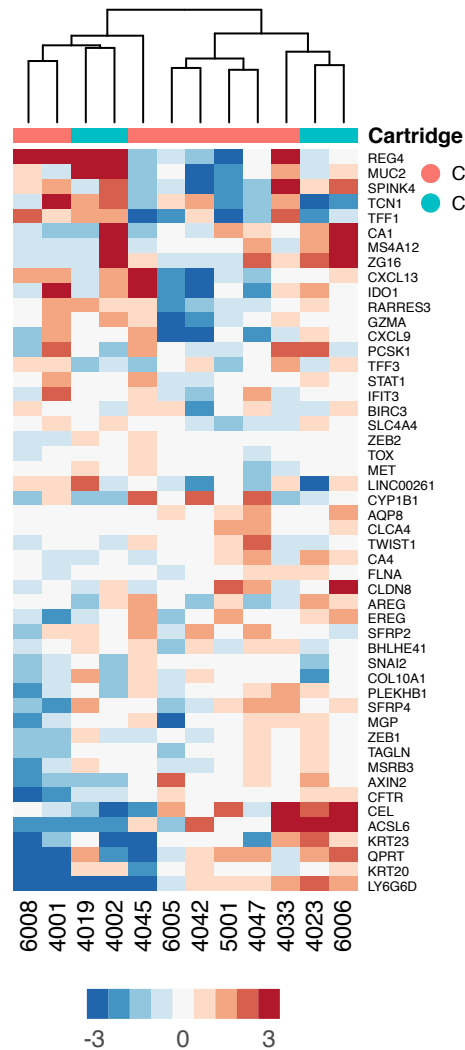

**(c) Modified Protocol**

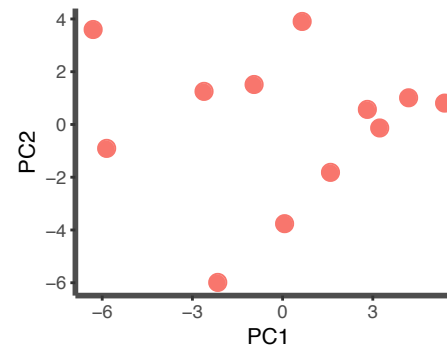

**(d) Modified Protocol**

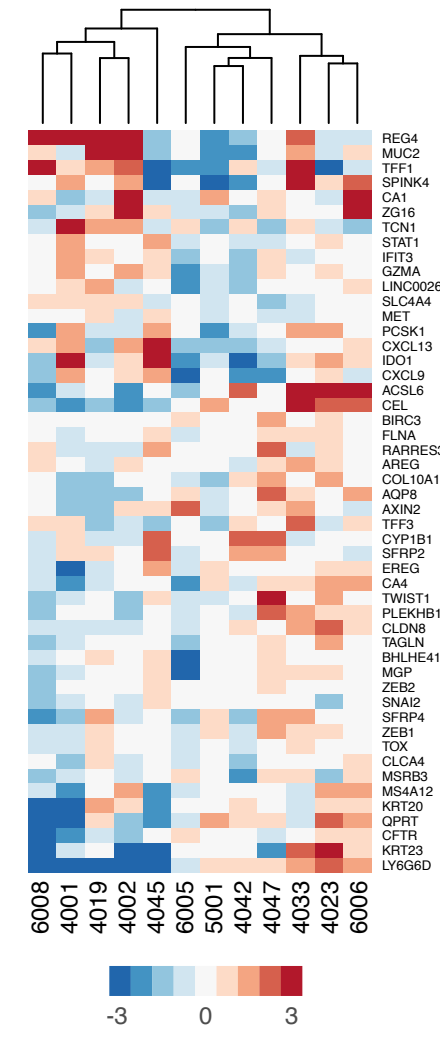

**(e) Modified + Standard Protocol - Median Centred**

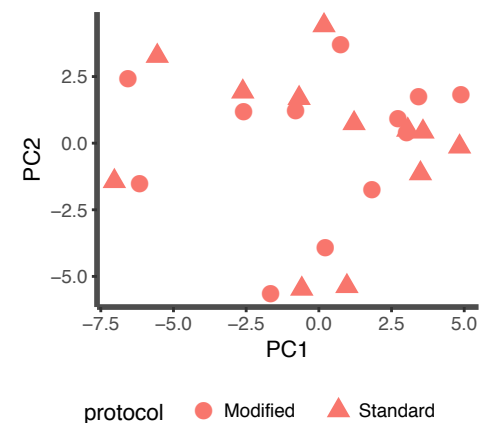

**(f) Modified Protocol Replicates**

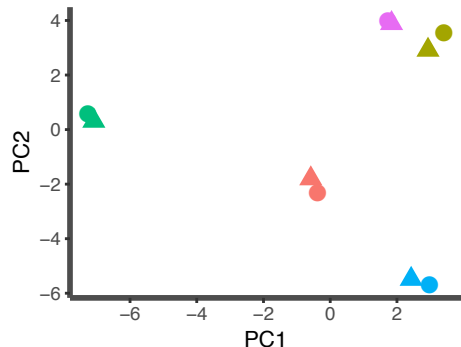



**Figure S4****(a) nCounter PCA**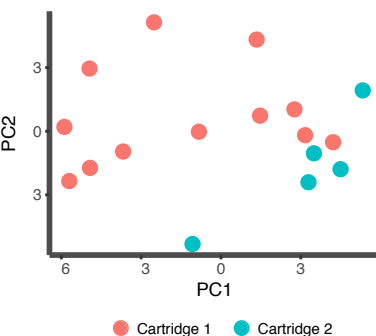**(c) Microarray PCA**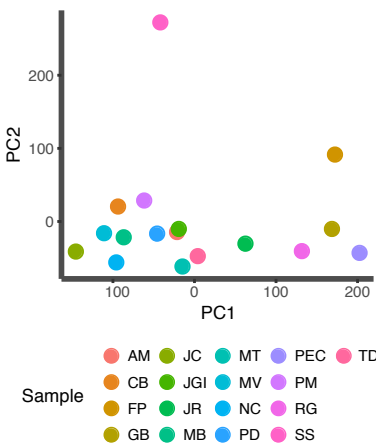**(b)**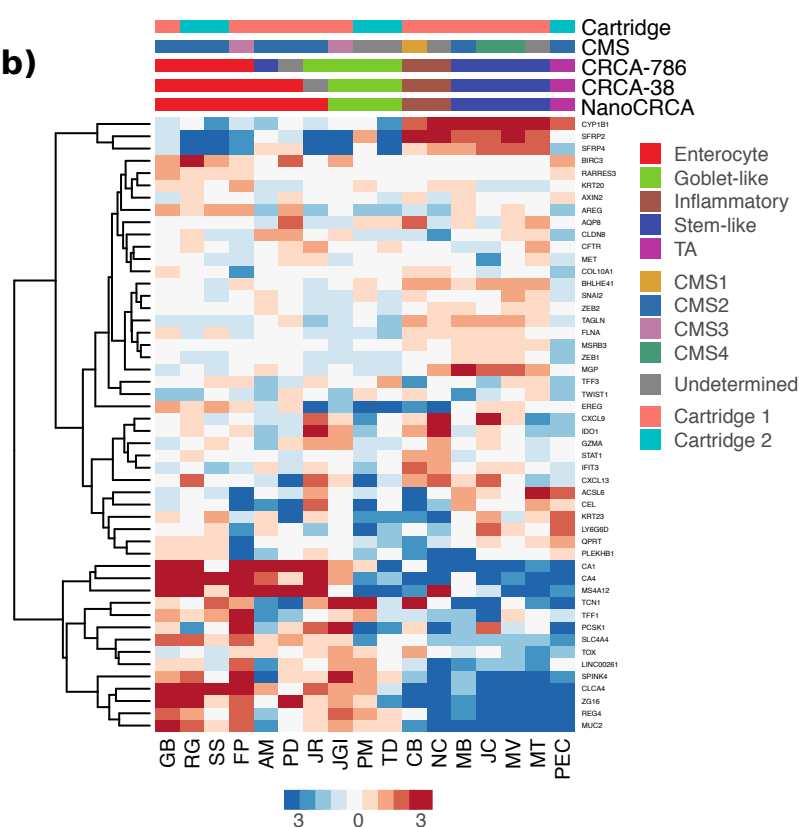**(d)****CRCA-38**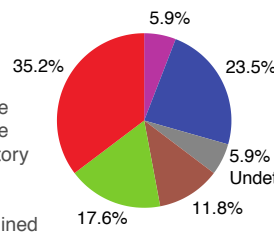**(e)****CRCA-786**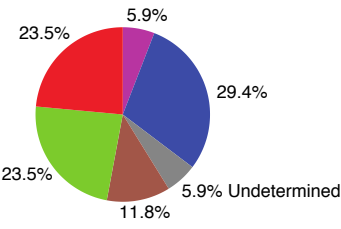

**Figure S5**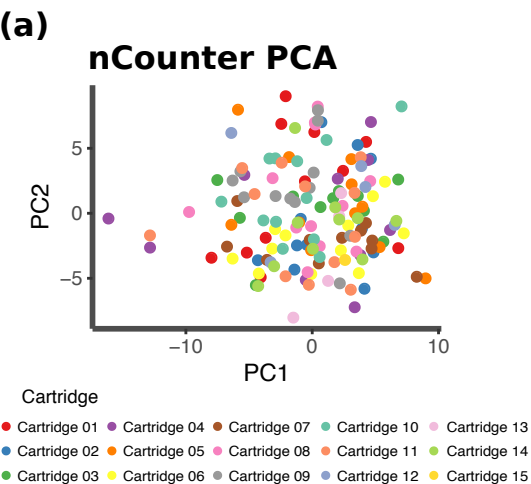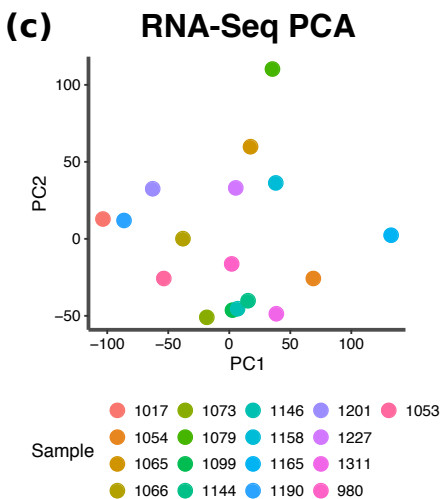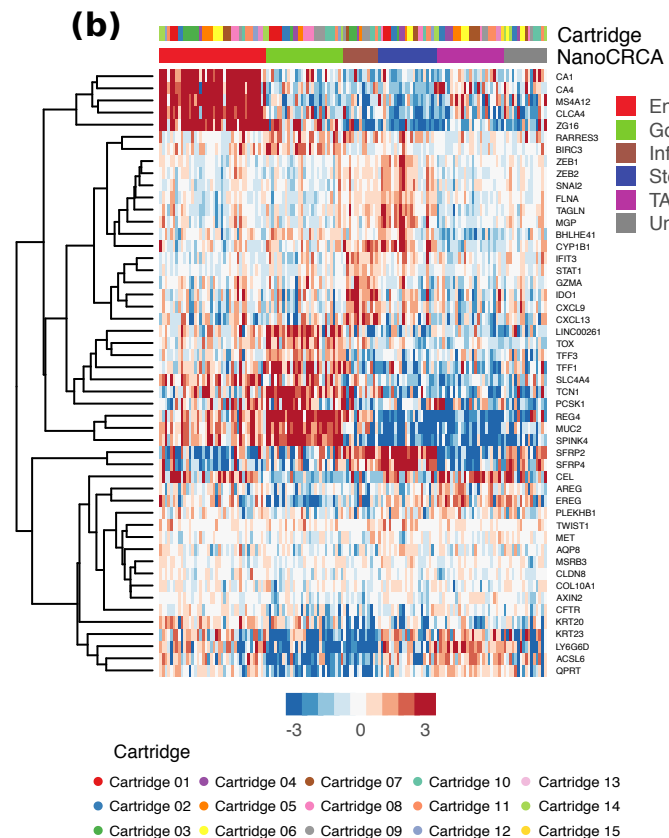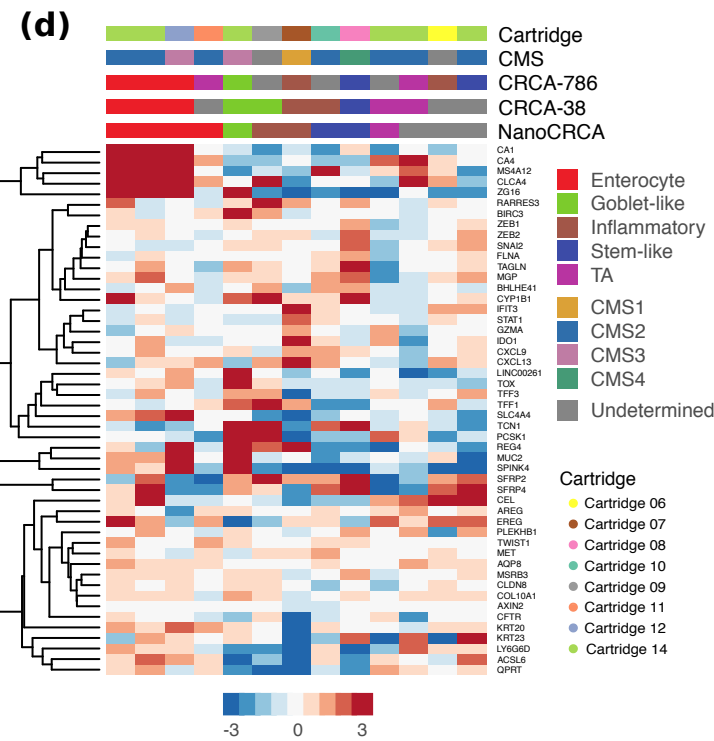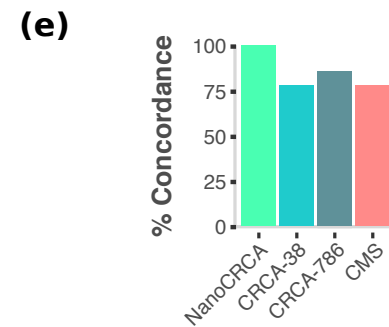

**Figure S6****(a) nCounter PCA**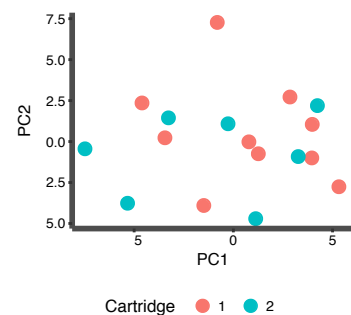**(c) Microarray PCA**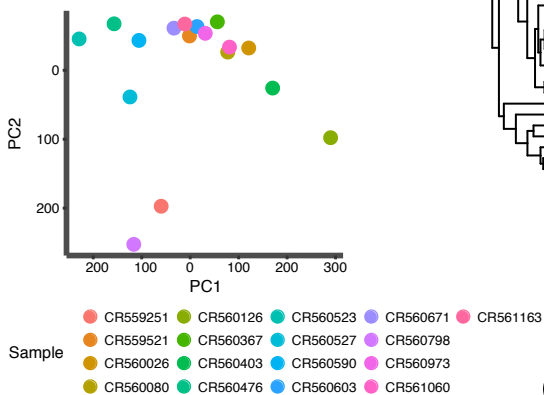**(b)**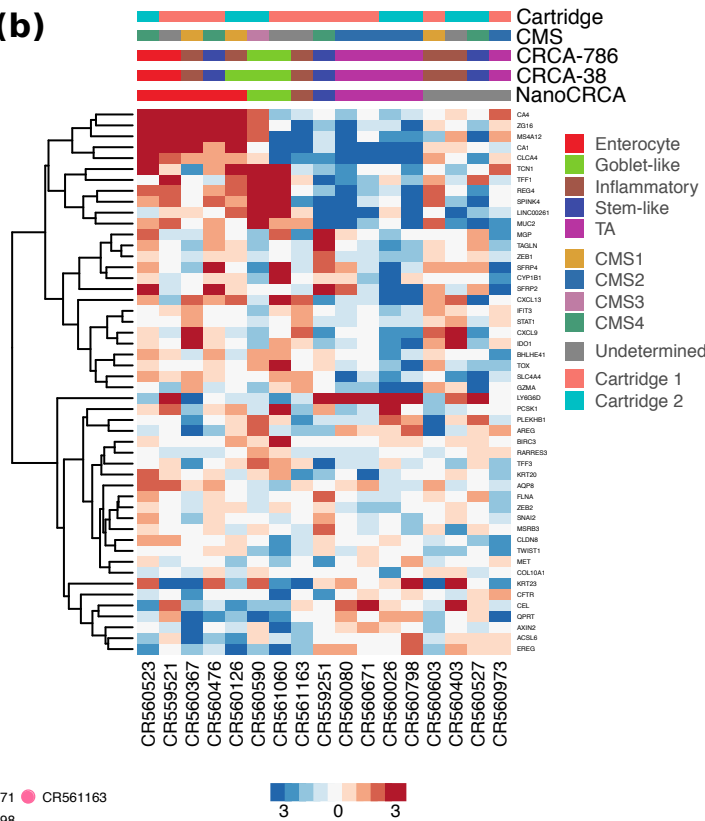**(d)**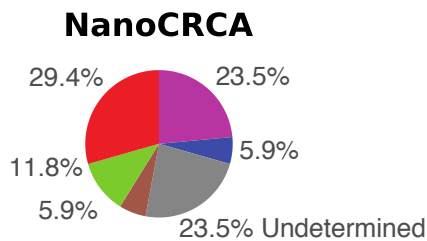

**Figure S7****(a) nCounter PCA**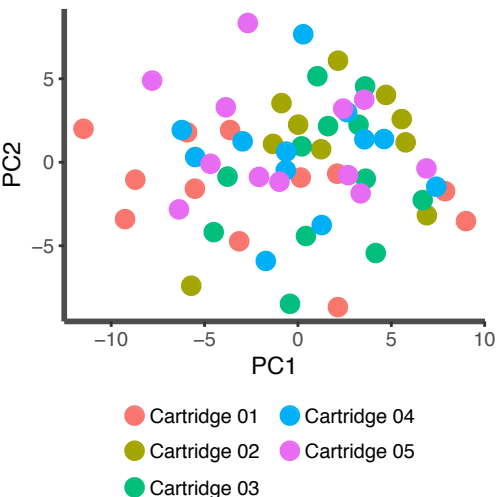**(b)**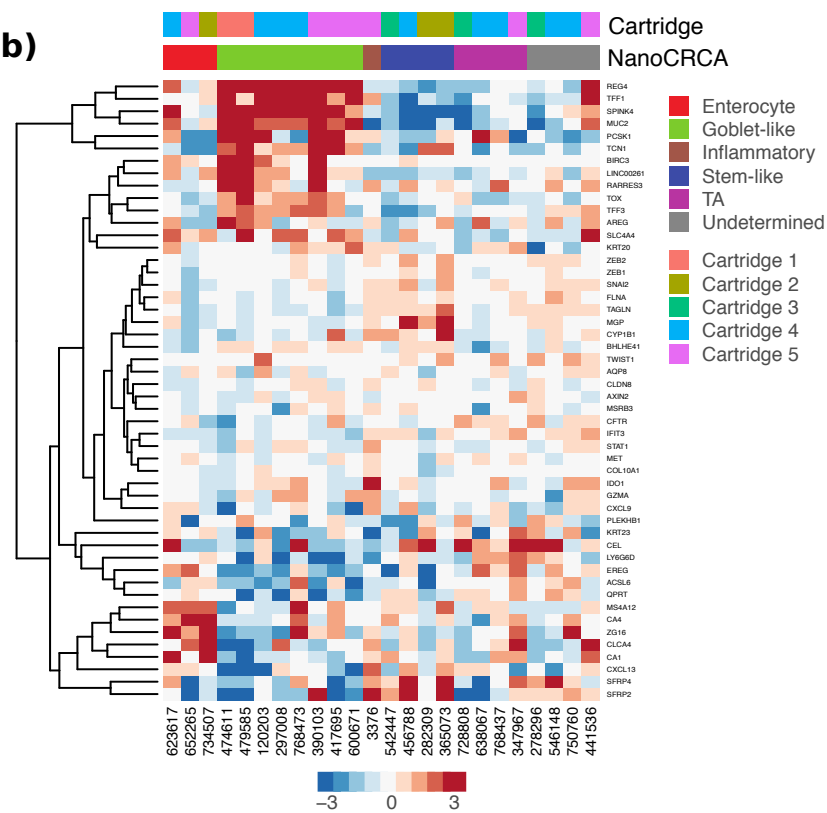**(e)**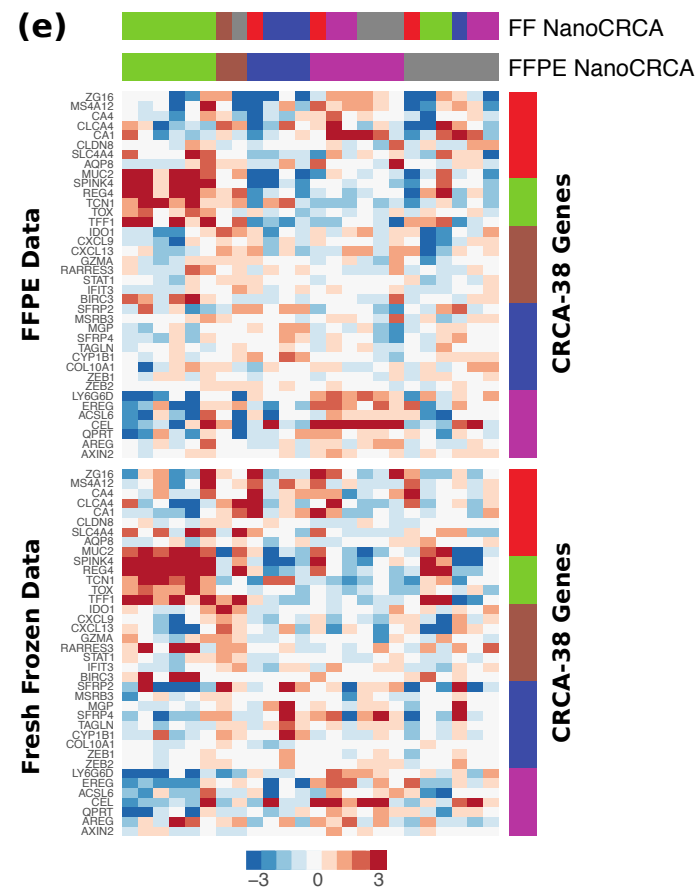**(c) nCounter PCA**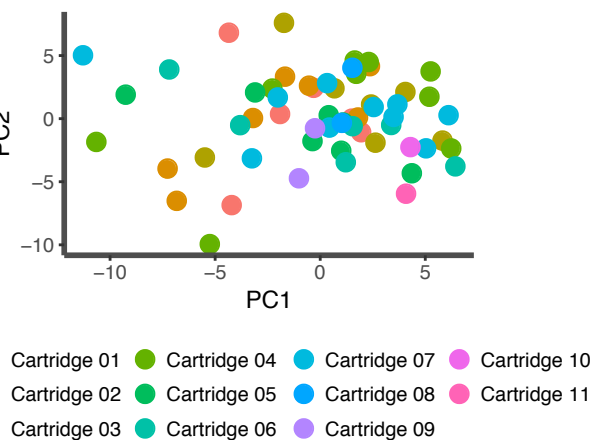**(d)**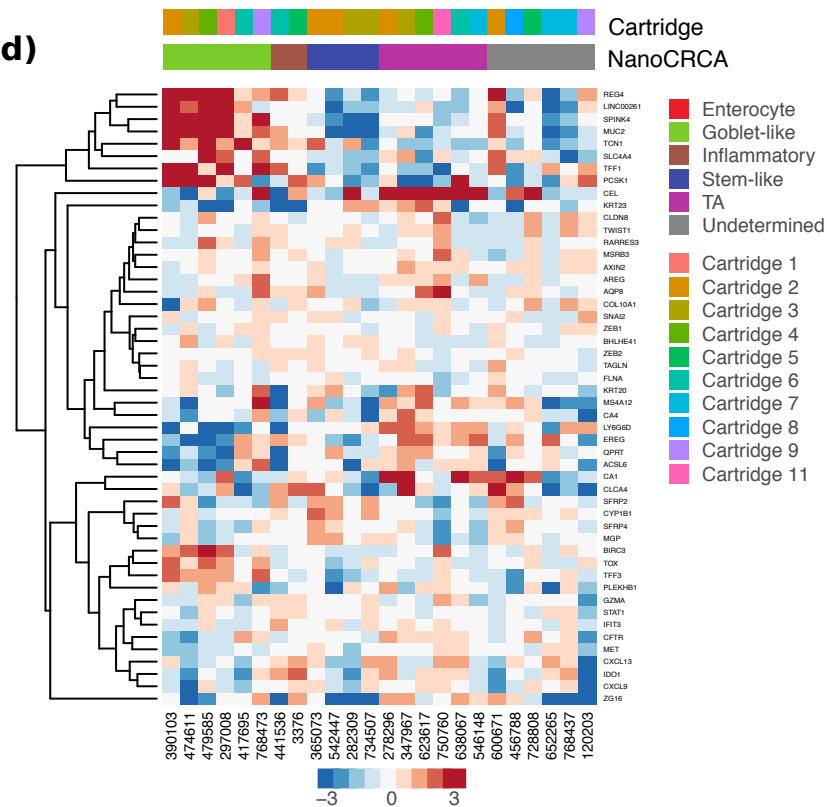



**Figure S8****(a) nCounter PCA**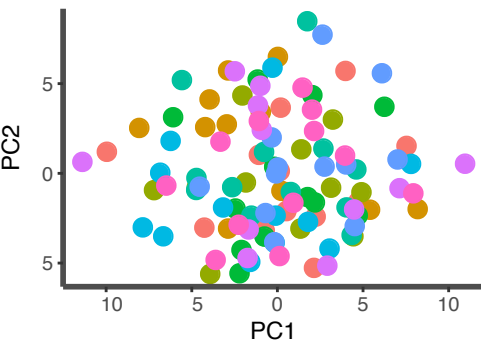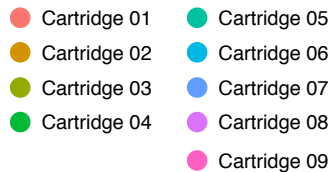**(b)**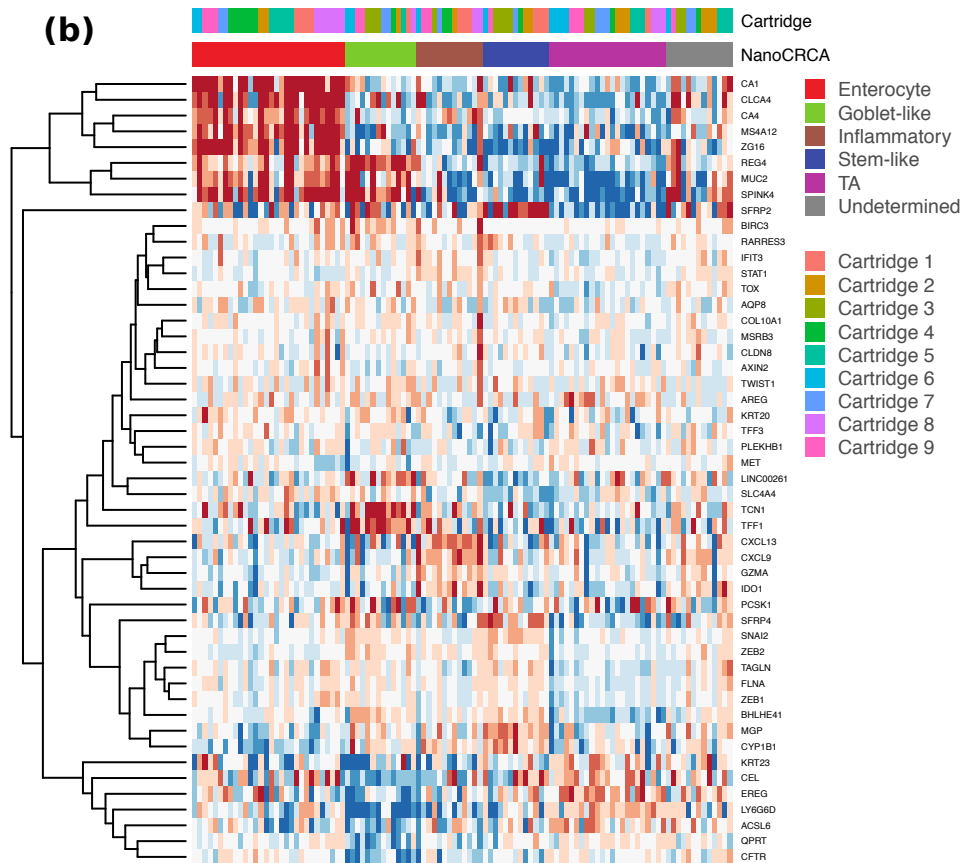

Supplement: 41598_2019_43492_MOESM1_ESM.pdf [file 41598_2019_43492_MOESM1_ESM.pdf]
